# Supplementary material
Source: PubMed Central journal article supplement (PMC3151072)
Supplement: supp_M111.237560_jbc.M111.237560-2.pdf [file supp_M111.237560_jbc.M111.237560-2.pdf]

## Supplementary Figure S2: Immunolocalization of RKIP

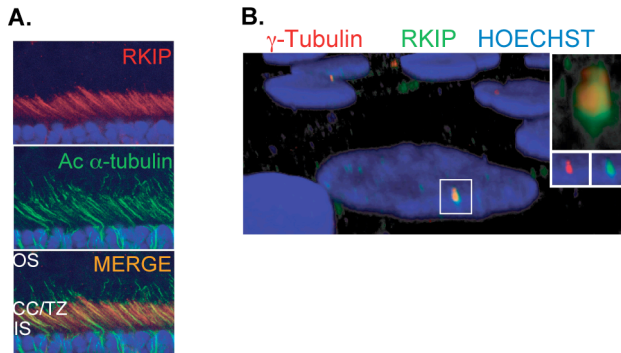

**Supplementary Figure S2:** **A.** Mouse retinal sections were stained with anti-RKIP (red) and anti-acetylated  $\alpha$ -tubulin (green). Merge image shows co-localization of the RKIP and acetylated tubulin signals at the transition zone (TZ) of photoreceptors. OS: outer segment; IS: inner segment; CC: connecting cilium. **B.** Serum-starved hTERT-RPE1 cells were stained with RKIP (green) and  $\gamma$ -tubulin (red) antibodies. Z-stacks were taken and 3D reconstruction was performed using Volocity software (Improvision). Insets show higher magnification of each channel in the boxed area. Nuclei are stained with Hoechst (blue).
