# Supplementary material
Source: PubMed Central journal article supplement (PMC3151072)
Supplement: supp_M111.237560_jbc.M111.237560-3.pdf [file supp_M111.237560_jbc.M111.237560-3.pdf]

**Supplementary Figure S3:** Histological analysis of zebrafish retina

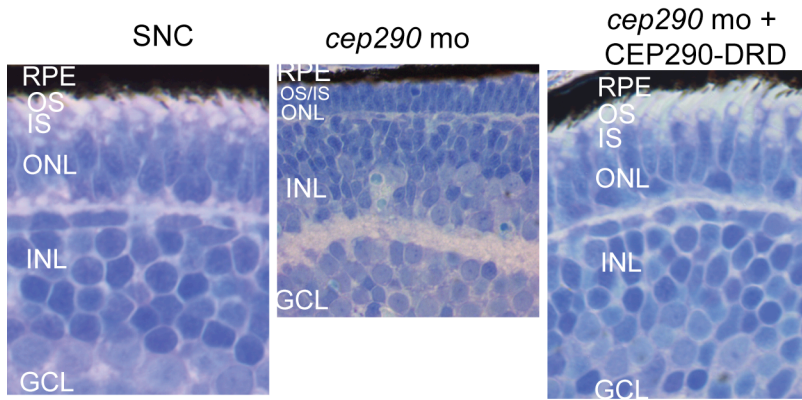

**Supplementary Figure S3:** Plastic sections of retina from 4 dpf zebrafish embryos injected with SNC or *cep290*-mo or co-injected with *cep290*-mo and mRNA encoding the DRD (*cep290* mo+DRD). Depletion of *cep290* resulted in the loss of outer segments whereas expression of the mRNA encoding the DRD resulted in a rescue of OS development.
